# Supplementary material for: Long-term efficacy and safety of lorlatinib versus alectinib in anaplastic lymphoma kinase-positive advanced/metastatic non-small cell lung cancer: matching-adjusted indirect comparison
Source: Atypon-hosted journal article supplement (doi:10.57264/cer-2025-0117), 2025-12-15
Supplement: supplementary materials.docx [file supplementary%20materials.docx]

**Supplementary Material for**

**Long-term Efficacy and Safety of Lorlatinib vs. Alectinib in Anaplastic Lymphoma Kinase-positive Advanced/Metastatic NSCLC: Matching-adjusted Indirect Comparison**

# **Ratio/Difference in Progression-free Survival Probabilities at Years 1–5**

For the patients in the lorlatinib and crizotinib arms in the CROWN trial (ITT population), annual landmark estimates were calculated directly from the Kaplan-Meier (KM) progression-free survival (PFS) probabilities at years 1–5 using individual patient data (IPD) provided in the CROWN trial. The survival estimates at years 1–4 for the patients in the alectinib and crizotinib arms of the ALEX trial were derived using reconstructed IPD based on digitized KM curves from the ALEX trial. PFS assessed by investigator (PFS-INV) with alectinib was extrapolated to facilitate an MAIC using 5-year PFS data. The last observed PFS probability at year 4 (and its associated standard error [SE]) with alectinib was conservatively assumed to be constant until year 5 given the observed plateau in the KM curve. These landmark PFS probabilities were compared to yield adjusted estimates of the ratio/difference in PFS probabilities at years 1–5 for lorlatinib versus alectinib. Given that no PFS events were assumed in the alectinib arm between years 4–5, the estimates yielded for the ratio/difference in PFS probabilities are considered conservative.

Asymptotic 95% confidence intervals (CIs) for the *difference* in PFS probabilities were calculated using the estimated SE for difference, which was calculated as the square root of the sum of the variances associated with the estimated PFS probabilities () in treatment arms 1 and 2 of each trial as follows:

where arm-specific SEs for were calculated using Greenwood’s formula using the *survival* package in R.[1] The SEs were approximated by assuming that the weights were fixed/known and by scaling the weights to reflect the effective sample size (ESS).

Asymptotic 95% CIs for the *ratio* of PFS probabilities were derived as follows. First, the SEs and 95% CIs were derived on the log scale, where the log of the ratio of two PFS probabilities is expressed as follows:

was estimated using arm-specific SEs for and the delta method as follows: . Following equation (1), the SE of the log-ratio was estimated using the following formula:

Equation (3) was used to calculate the SEs for the log-ratio of PFS-probabilities at years 1–5 within each trial, and . As this is an anchored comparison, the SE of the lorlatinib versus alectinib ratio was estimated by combining the SEs of the trial-specific ratios in a similar fashion to equation (3) as follows:

The estimated SE was used to calculate the 95% CIs for on the log-scale. These 95% CIs were exponentiated to obtain the 95% CI for the *ratio* of PFS probabilities for lorlatinib versus alectinib on the natural scale.

# **Ratio/Difference in Restricted Mean Survival Time Up to Year 4 and Up to the Maximum Follow-up of the CROWN Trial**

As an alternative to hazard ratios (HRs) estimated by Cox proportional hazard models, the ratio/difference in restricted mean survival time (RMST) up to a pre-specified timepoint is an intuitive effect measure that offers a clinically meaningful interpretation.[2] RMST can be interpreted as the average PFS from time 0 up to a specific timepoint of interest, denoted . RMST is defined mathematically as the area under the estimated KM curve for PFS from time 0 to and is expressed as follows:

In practice, Equation (5) is typically approximated with Riemann sums. The difference in RMST between the two treatment arms (1 vs. 2) from each trial is as follows:

and the ratio of RMST is defined as follows:

The point estimates and 95% CIs for the RMST ratios and differences were obtained using modified versions of the *rmst1* and *rmst2* functions in the *survRM2* package and the *adjusted.KM* function in the *IPWsurvival* package in R.[3] This updated code allows for the implementation of weights when estimating RMST ratios/differences in an MAIC analysis. The indirect comparisons were conducted in a similar manner to that above. The SEs were approximated by assuming that the weights were fixed/known and by scaling the weights to reflect the effective sample size.

**References**

1. Therneau T. A package for survival analysis in R. R package version 3.7-0. 2024. December 17, 2024. Accessed August 15, 2024. <https://CRAN.R-project.org/package=survival>

2. Conner SC, Sullivan LM, Benjamin EJ, et al. Adjusted restricted mean survival times in observational studies. *Stat Med*. 38(20), 3832-3860 (2019). doi:10.1002/sim.8206

3. Conner SC. akm-rmst/AKM_rmst.R. 2020. May 22, 2022. Accessed August 15, 2024. <https://github.com/s-conner/akm-rmst/blob/master/AKM_rmst.R>
